# Supplementary material for: Reduced monocyte and macrophage TNFSF15/TL1A expression is associated with susceptibility to inflammatory bowel disease
Source: PubMed Central journal article supplement (PMC6130856; doi:10.1371/journal.pgen.1007458), 2018-09-10
Supplement: pgen.1007458.s014.pdf [file pgen.1007458.s014.pdf]

**S2 Table:**

**Allele-specific expression statistics from measurements on stimulated cells from rs6478109 heterozygous bioresource volunteers depicted in Fig 2 C-D.**

|                                                 | <b>n</b> | <b>ASE SNP</b> | <b>μ cDNA – μ gDNA</b> | <b>95% CI</b>   | <b>p-value</b> |
|-------------------------------------------------|----------|----------------|------------------------|-----------------|----------------|
| monocytes - immune complex stimulation          | 7        | rs4246905      | 1.282                  | (1.083, 1.482)  | 1.09E-06       |
| monocytes - intracellular poly(I:C) stimulation | 10       | rs4263839      | 0.434                  | (0.079, 0.789)  | 2.15E-02       |
| monocytes - LPS stimulation                     | 12       | rs4246905      | 1.039                  | (0.721, 1.358)  | 1.46E-05       |
| CD4+ T cells - anti-CD3/anti-CD28 stimulation   | 11       | rs4246905      | -0.177                 | (-0.447, 0.092) | 1.75E-01       |
| CD8+ T cells - anti-CD3/anti-CD28 stimulation   | 10       | rs4263839      | -0.093                 | (-0.340, 0.154) | 4.24E-01       |
