# Supplementary material for: Reduced monocyte and macrophage TNFSF15/TL1A expression is associated with susceptibility to inflammatory bowel disease
Source: PubMed Central journal article supplement (PMC6130856; doi:10.1371/journal.pgen.1007458), 2018-09-10
Supplement: pgen.1007458.s016.pdf [file pgen.1007458.s016.pdf]

**S4 Table:****Primers used for pre-amplification in allele-specific expression assay**

| <b>SNP</b> | <b>Primer names</b>                  | <b>Sequences (5'-3')</b>                     | <b>Fragment Size</b> |
|------------|--------------------------------------|----------------------------------------------|----------------------|
| rs4246905  | TL1A-rs4246905-F<br>TL1A-rs4246905-R | TGCTGTGTGGGAGTTTGTCT<br>TCATTCCTCCCCAAAGCAGT | 164 bp               |
| rs4263839  | TL1A-rs4263839-F<br>TL1A-rs4263839-R | ACCCCCATTTCCCTCTCCTT<br>ACTCACTGCTACTGCCCTA  | 208 bp               |
