# Supplementary material for: Reduced monocyte and macrophage TNFSF15/TL1A expression is associated with susceptibility to inflammatory bowel disease
Source: PubMed Central journal article supplement (PMC6130856; doi:10.1371/journal.pgen.1007458), 2018-09-10
Supplement: pgen.1007458.s017.pdf [file pgen.1007458.s017.pdf]

**S5 Table:****Antibody panels for human immunophenotyping**

| <b>Panel</b>            | <b>Target</b> | <b>Clone</b>     | <b>Color</b>                  | <b>Company</b>                   |
|-------------------------|---------------|------------------|-------------------------------|----------------------------------|
| T cells –<br>basic      | Live/Dead     |                  | Blue                          | Life Technologies                |
|                         | CD3           | SK7              | Am-Cyan                       | BD Biosciences                   |
|                         | CD4           | RPA-T4           | APC-eFluor 780                | eBioscience                      |
|                         | CD8           | RPA-T8           | Pacific Blue                  | BD Biosciences                   |
|                         | CD45RA        | HI100            | PerCP-Cy5.5                   | eBioscience                      |
|                         | CD27          | O323             | PE-Cy7                        | eBioscience                      |
|                         | CCR7          | 150503           | PE                            | BD Biosciences                   |
| T cells –<br>Th subsets | Live/Dead     |                  | Aqua                          | Life Technologies                |
|                         | CD3           | OKT3             | eFluor 650-NC                 | eBioscience                      |
|                         | CD4           | RPA-T4           | APC-eFluor 780                | eBioscience                      |
|                         | CD8           | RPA-T8 or<br>SK1 | Pacific Blue or<br>eFluor 450 | BD Biosciences or<br>eBioscience |
|                         | CD45RA        | HI100            | PerCP-Cy5.5                   | eBioscience                      |
|                         | CCR7          | 150503           | PE                            | BD Biosciences                   |
|                         | CXCR3         | 49801            | FITC                          | R&D Systems                      |
|                         | CCR6          | R6H1             | PE-Cy7                        | eBioscience                      |
| T cells –<br>Treg       | Live/Dead     |                  | Aqua                          | Life Technologies                |
|                         | CD3           | OKT3             | eFluor 650-NC                 | eBioscience                      |
|                         | CD4           | RPA-T4           | APC-eFluor 780                | eBioscience                      |
|                         | CD8           | RPA-T8 or<br>SK1 | Pacific Blue or<br>eFluor 450 | BD Biosciences or<br>eBioscience |
|                         | CD45RA        | HI100            | PerCP-Cy5.5                   | eBioscience                      |
|                         | CCR4          | 1G1              | PE-Cy7                        | BD Biosciences                   |

|                                               |                  |                    |                                  |                                  |
|-----------------------------------------------|------------------|--------------------|----------------------------------|----------------------------------|
|                                               | CD25             | M-A251             | PE                               | BD Biosciences                   |
|                                               | CD127            | hIL-7R-M21         | Alexa-Fluor 647                  | BD Biosciences                   |
| B cells                                       | Live/Dead        |                    | Blue                             | Life Technologies                |
|                                               | CD20             | 2H7                | APC-eFluor 780                   | eBioscience                      |
|                                               | CD19             | HIB19              | V450                             | BD Biosciences                   |
|                                               | CD38             | HB7                | eFluor 650-NC                    | eBioscience                      |
|                                               | CD24             | ML5                | PerCP-Cy5.5                      | BD Biosciences                   |
|                                               | CD27             | O323               | PE-Cy7                           | eBioscience                      |
|                                               | IgD              | IA6-2              | FITC                             | BD Biosciences                   |
| monocytes,<br>dendritic<br>cells, NK<br>cells | Live/Dead        |                    | Blue or Aqua                     | Life Technologies                |
|                                               | CD20             | 2H7                | APC-eFluor 780                   | eBioscience                      |
|                                               | CD19             | HIB19              | APC-eFluor 780                   | eBioscience                      |
|                                               | CD3              | SK7 or<br>OKT3     | Am-Cyan or<br>eFluor 650-NC      | BD Biosciences or<br>eBioscience |
|                                               | CD11c            | 3.9                | PE-Cy7                           | eBioscience                      |
|                                               | CD123            | 6H6                | PerCP-Cy5.5                      | eBioscience                      |
|                                               | CD14             | 61D3               | eFluor 605-NC                    | eBioscience                      |
|                                               | CD16             | 3G8 or<br>eBioCB16 | Pacific Blue or<br>APC           | BD Biosciences or<br>eBioscience |
|                                               | CD56             | MEM-188            | FITC                             | eBioscience                      |
| HLA-DR                                        | G46-6 or<br>L243 | PE or eFluor 450   | BD Biosciences or<br>eBioscience |                                  |
