# Supplementary material for: Reduced monocyte and macrophage TNFSF15/TL1A expression is associated with susceptibility to inflammatory bowel disease
Source: PLoS Genet. 2018 Sep 10;14(9):e1007458. doi: 10.1371/journal.pgen.1007458 (PMC6130856; doi:10.1371/journal.pgen.1007458)
Supplement: S3 Table — (PDF) [file pgen.1007458.s015.pdf]

**S3 Table:**  
**Evaluation of potential candidate SNPs at the *TNFSF15* IBD susceptibility locus**

| SNP <sup>A,B</sup>         | Location        | LD $r^2$ with<br>rs4246905 | LD $r^2$ with<br>rs4263839 | LD $r^2$ with<br>rs6478109 |
|----------------------------|-----------------|----------------------------|----------------------------|----------------------------|
| rs6478108                  | intron 1        | 0.599                      | 0.939                      | 0.917                      |
| rs4372078                  | intron 1        | 0.722                      | 0.873                      | 0.854                      |
| rs4366152                  | intron 1        | 0.634                      | 1.000                      | 0.977                      |
| rs4263839                  | intron 1        | 0.634                      | 1.000                      | 0.977                      |
| <a href="#">rs6478109</a>  | <u>upstream</u> | <u>0.618</u>               | <u>0.977</u>               | <u>1.000</u>               |
| <a href="#">rs7848647</a>  | <u>upstream</u> | <u>0.615</u>               | <u>0.973</u>               | <u>0.995</u>               |
| rs35396782                 | upstream        | 0.668                      | 0.828                      | 0.817                      |
| <a href="#">rs10817678</a> | <u>upstream</u> | <u>0.580</u>               | <u>0.925</u>               | <u>0.947</u>               |
| rs7869487                  | upstream        | 0.631                      | 0.772                      | 0.761                      |
| rs722126                   | upstream        | 0.506                      | 0.759                      | 0.749                      |
| rs1853187                  | upstream        | 0.391                      | 0.699                      | 0.695                      |
| rs4979464                  | upstream        | 0.391                      | 0.699                      | 0.695                      |
| rs7040029                  | upstream        | 0.495                      | 0.733                      | 0.723                      |
| rs1467563                  | upstream        | 0.472                      | 0.740                      | 0.730                      |
| rs6478113                  | upstream        | 0.355                      | 0.640                      | 0.659                      |
| rs7866342                  | upstream        | 0.472                      | 0.740                      | 0.730                      |
| rs911605                   | upstream        | 0.416                      | 0.640                      | 0.630                      |

Table lists SNPs that are both in greater LD with rs6478109 and rs4263839 than with rs4246905 and are in greater LD with rs6478109 and rs4263839 than is rs4246905. LD calculations were made using the 1000 Genomes Phase 3 EUR cohort.

<sup>A</sup> Colored SNPs correspond to SNPs in Fig 4.

<sup>B</sup> Italicized, underlined SNPs are those in high LD with rs6478109 ( $r^2 > 0.8$ ) that are in greater LD with rs6478109 than with rs4263839.
